# Supplementary material for: Piano-stool metal complexes as inhibitors of amyloid-β aggregation in vitro and in vivo
Source: Royal Society of Chemistry journal article supplement (doi:10.1039/d4qi01460j), 2024-01-01
Supplement: d4qi01460j1.pdf [file d4qi01460j1.pdf]

## Supporting Information

### Piano-stool metal complexes as inhibitors of amyloid- $\beta$ aggregation *in vitro* and *in vivo*.

Gloria Viguera, Raimon Sabate, Leoní A. Barrios, Ana B. Caballero,\* Samanta Hernández-García, Pau Bayón, Fernando Gandía-Herrero,\* José Ruiz \* and Patrick Gamez

#### Table of Contents

|                                                                                                                                                                                              |            |
|----------------------------------------------------------------------------------------------------------------------------------------------------------------------------------------------|------------|
| <b>Figure S1.</b> Stability of complexes <b>1–4</b> in PBS (5% DMSO).                                                                                                                        | S2         |
| <b>Table S1.</b> Crystal data and structure refinement for compound <b>4</b> .                                                                                                               | S3         |
| <b>Table S2.</b> Selected bond distances (Å) and angles (°) for compound <b>4</b> .                                                                                                          | S4         |
| <b>Figure S2.</b> Fluorescence emission spectra of complexes <b>1–4</b> .                                                                                                                    | S5         |
| <b>Figure S3.</b> Time-course kinetics of the aggregation of free A $\beta$ 40 (control) and in the presence of complexes <b>1–4</b> . [A $\beta$ 40] = 20 $\mu$ M; [complex] = 100 $\mu$ M. | S5         |
| <b>Figure S4.</b> Time-course kinetics of the aggregation of free A $\beta$ 42 (control) and in the presence of equimolar amounts of complexes <b>1–4</b> . [A $\beta$ 42] = 10 $\mu$ M      | S6         |
| <b>Figure S5.</b> DLS data for free A $\beta$ 40 and in the presence of complexes <b>1–4</b> , after an aggregation time of 24 h.                                                            | S7         |
| <b>Figure S6.</b> Inhibition vs. concentration curve and fitting for complexes <b>2</b> and <b>4</b> .                                                                                       | S8         |
| <b>Figure S7.</b> ESI-MS spectra of A $\beta$ (1-40) peptide recorded after the incubation with equimolar amounts of compounds <b>1-4</b> at 37 °C for 24 h.                                 | S9-<br>S10 |
| <b>Figure S8.</b> <sup>1</sup> H NMR (top) and <sup>13</sup> C NMR (bottom) spectra of complex <b>1</b> .                                                                                    | S11        |
| <b>Figure S9.</b> ESI MS spectra of <b>1</b> .                                                                                                                                               | S12        |
| <b>Figure S10.</b> <sup>1</sup> H NMR (top) and <sup>13</sup> C NMR (bottom) spectra of complex <b>2</b> .                                                                                   | S13        |
| <b>Figure S11.</b> ESI MS spectra of <b>2</b> .                                                                                                                                              | S14        |
| <b>Figure S12.</b> <sup>1</sup> H NMR (top) and <sup>13</sup> C NMR (bottom) spectra of complex <b>3</b> .                                                                                   | S15        |
| <b>Figure S13.</b> ESI MS spectra of <b>3</b> .                                                                                                                                              | S16        |
| <b>Figure S14.</b> <sup>1</sup> H NMR (top) and <sup>13</sup> C NMR (bottom) spectra of complex <b>4</b> .                                                                                   | S17        |
| <b>Figure S15.</b> ESI MS spectra of <b>4</b> .                                                                                                                                              | S18        |

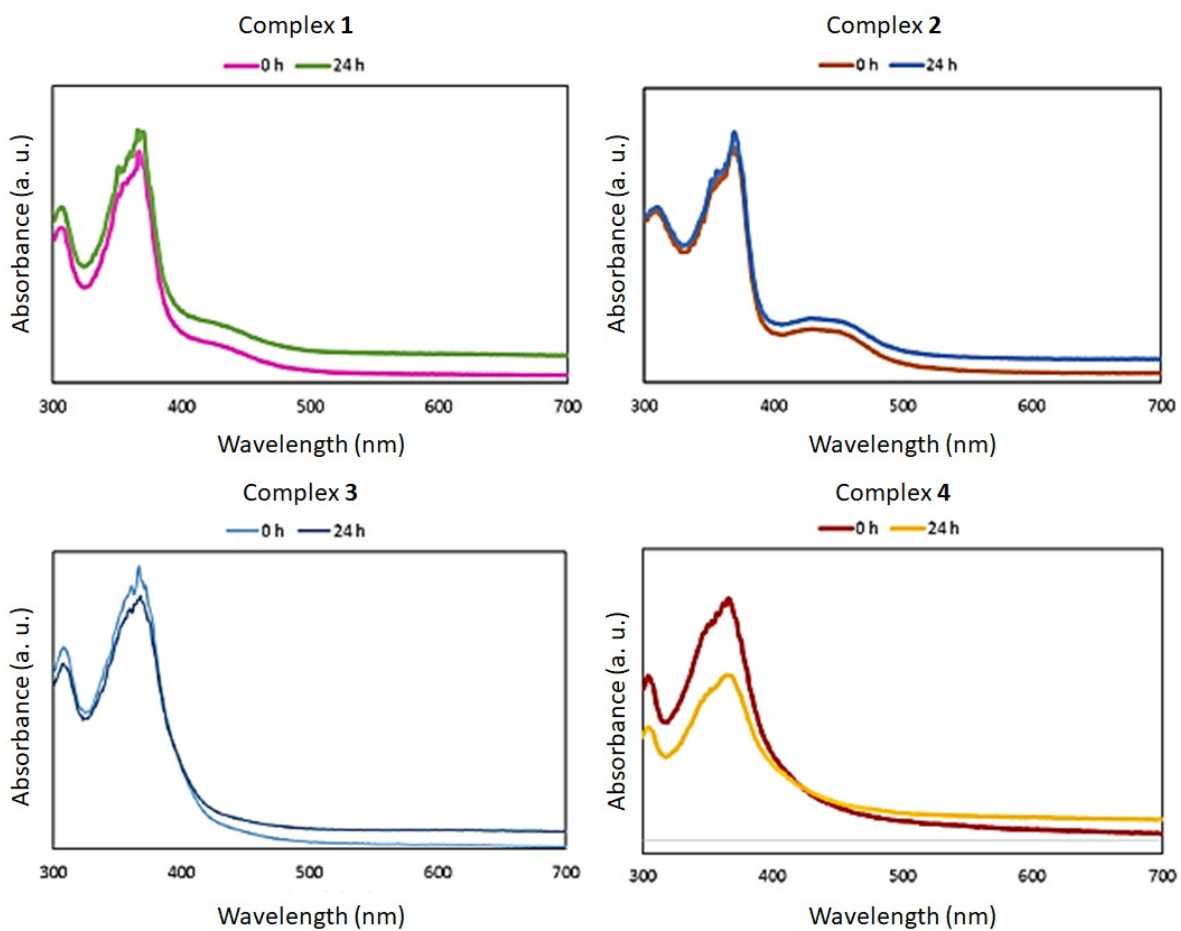

**Figure S1.** Evaluation by UV-Vis spectroscopy of the stability of complexes **1–4** in PBS (5% DMSO) at 37 °C. [Complex] = 10  $\mu$ M.

**Table S1.** Crystal data and structure refinement for compound **4** (CCDC 2359733).

|                                                              |                                                                                                                        |
|--------------------------------------------------------------|------------------------------------------------------------------------------------------------------------------------|
| Compound                                                     | <b>4</b>                                                                                                               |
| Empirical formula                                            | C <sub>32</sub> H <sub>36</sub> ClN <sub>3</sub> O <sub>2</sub> Rh, CH <sub>2</sub> Cl <sub>2</sub> , F <sub>6</sub> P |
| Formula weight (g mol <sup>-1</sup> )                        | 862.89                                                                                                                 |
| Temperature (K)                                              | 100                                                                                                                    |
| Crystal system                                               | triclinic                                                                                                              |
| Space group                                                  | <i>P</i> -1                                                                                                            |
| Crystal size (mm <sup>3</sup> )                              | 0.3 × 0.17 × 0.13                                                                                                      |
| <i>a</i> (Å)                                                 | 11.8922(13)                                                                                                            |
| <i>b</i> (Å)                                                 | 12.5691(15)                                                                                                            |
| <i>c</i> (Å)                                                 | 13.0059(15)                                                                                                            |
| $\alpha$ (°)                                                 | 105.907(4)                                                                                                             |
| $\beta$ (°)                                                  | 92.694(4)                                                                                                              |
| $\gamma$ (°)                                                 | 97.271(4)                                                                                                              |
| <i>V</i> (Å <sup>3</sup> )                                   | 1847.8(4)                                                                                                              |
| <i>Z</i>                                                     | 2                                                                                                                      |
| $\rho_{\text{calcd}}$                                        | 1.551                                                                                                                  |
| $\mu$ (mm <sup>-1</sup> )                                    | 0.787                                                                                                                  |
| <i>F</i> (000)                                               | 876                                                                                                                    |
| $\theta$ for data collection (°)                             | 1.999 – 30.642                                                                                                         |
| Reflections collected / unique                               | 303126 / 11363                                                                                                         |
| Completeness to theta                                        | 1.000                                                                                                                  |
| Data / restraints / parameters                               | 11363 / 3 / 449                                                                                                        |
| Goodness-of-fit on <i>F</i> <sup>2</sup>                     | 1.065                                                                                                                  |
| Final <i>R</i> indices [ <i>I</i> > 2 $\sigma$ ( <i>I</i> )] | R1 = 0.0384, wR2 = 0.0968                                                                                              |
| <i>R</i> indices (all data)                                  | R1 = 0.0430, wR2 = 0.0996                                                                                              |
| largest diff. peak and hole (e Å <sup>3</sup> )              | 1.761 and -1.424                                                                                                       |

**Table S2.** Selected bond distances (Å) and angles (°) for compound **4**. The atom labelling is shown in **Figure S2**.

|           |           |
|-----------|-----------|
| Rh-N1     | 2.175(2)  |
| Rh-N3     | 2.105(2)  |
| Rh-Cl1    | 2.397(1)  |
| Rh-C      | 1.780(1)  |
|           |           |
| N1-Rh-N3  | 75.07(7)  |
| Cl1-Rh-N3 | 92.52(5)  |
| Cl1-Rh-N1 | 93.05(5)  |
| Cl1-Rh-C  | 124.70(4) |
| N1-Rh-C   | 128.85(6) |
| N3-Rh-C   | 128.23(6) |

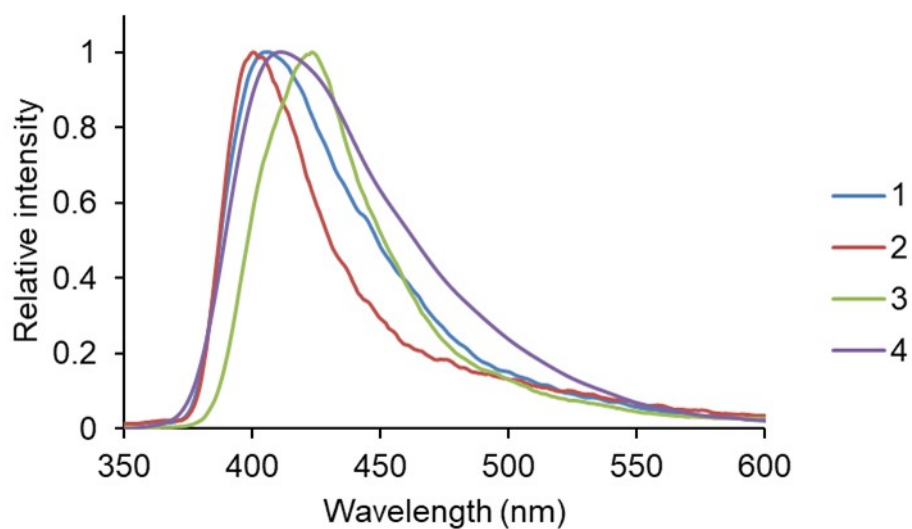

**Figure S2.** Fluorescence emission spectra of **1** – **4** ( $\lambda_{\text{exc}} = 330 \text{ nm}$ ). The complexes emit in the 403 – 422 nm range.

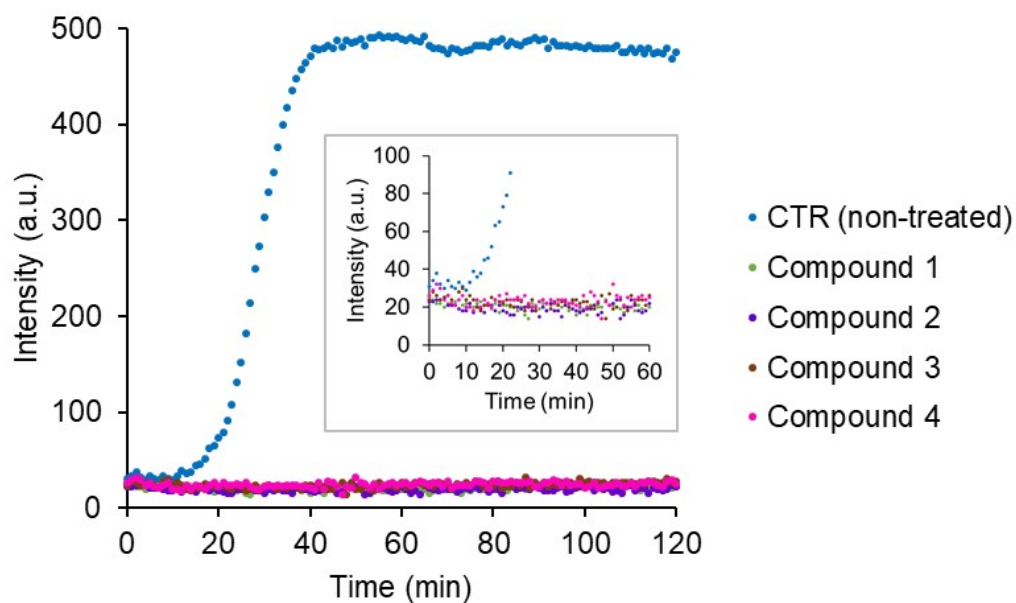

**Figure S3.** Time-course kinetics of the aggregation of free Aβ40 (control) and in the presence of complexes **1**–**4**. [Aβ40] = 20 μM; [complex] = 100 μM.

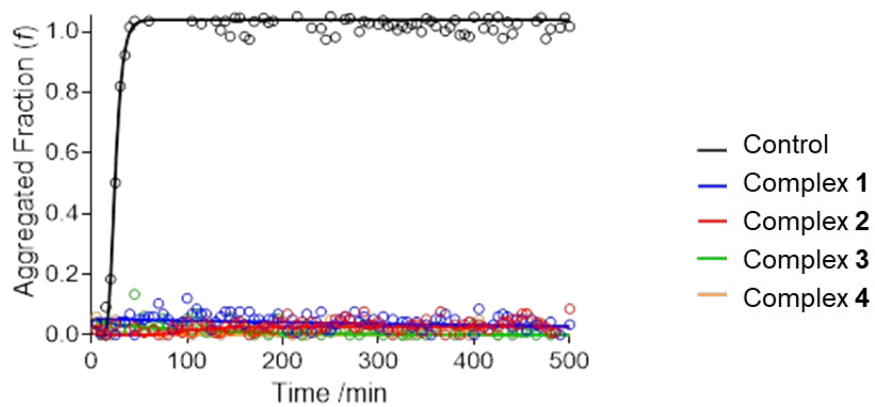

**Figure S4.** Time-course kinetics of the aggregation of free Aβ42 (control) and in the presence of equimolar amounts of complexes 1–4. [Aβ42] = 10 μM

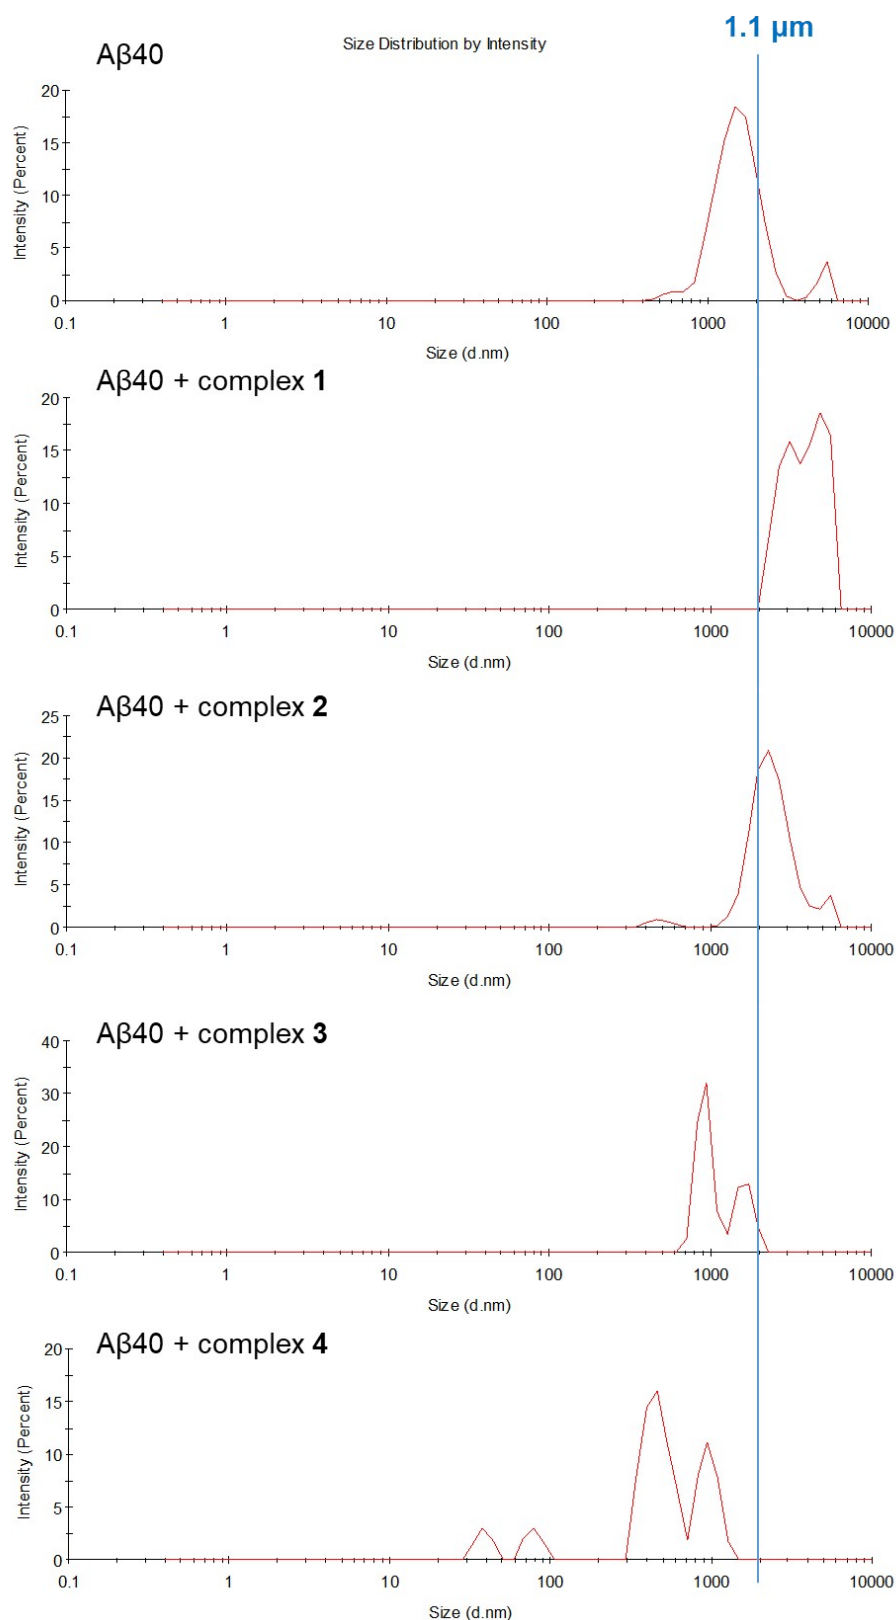

**Figure S5.** Size distribution by DLS intensity of liquid samples of free  $A\beta_{40}$  and  $A\beta_{40}$  in the presence of complexes 1–4, after incubating at 37 °C for 24 h. [ $A\beta_{40}$ ] = 10  $\mu\text{M}$ ; [complex] = 10  $\mu\text{M}$ . These histograms are averaged from at least three replicates.

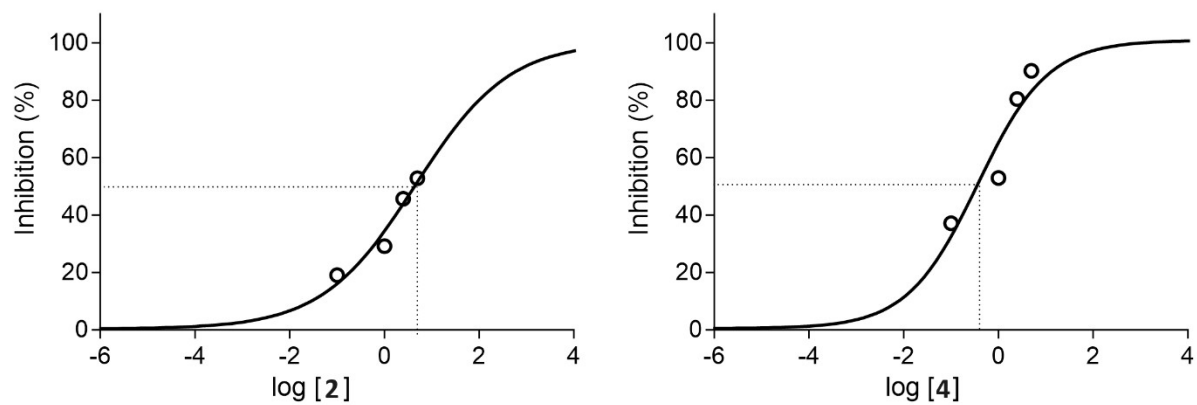

**Figure S6.** Inhibition vs. concentration curves and fitting of compounds **2** (left) and **4** (right).



a) A $\beta$ (1-40)

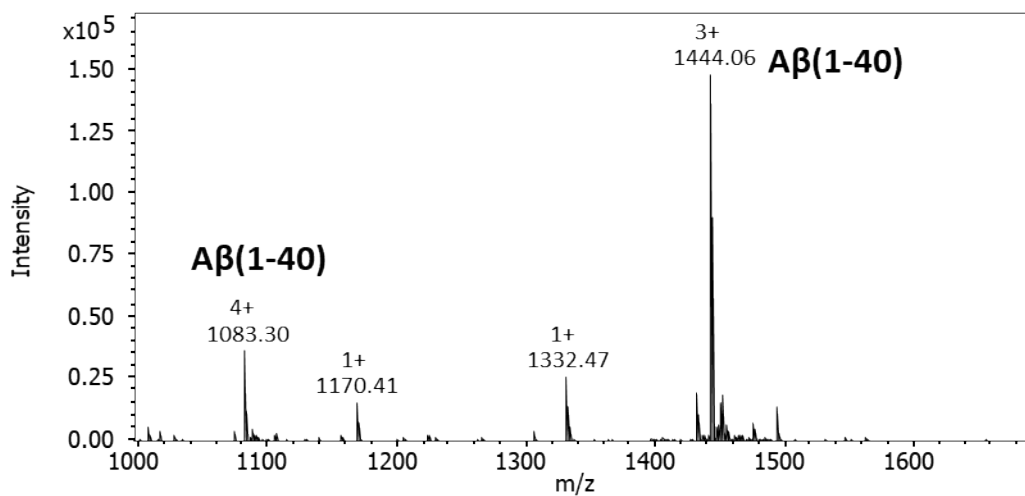

b) A $\beta$ (1-40) + compound 1, 1:1

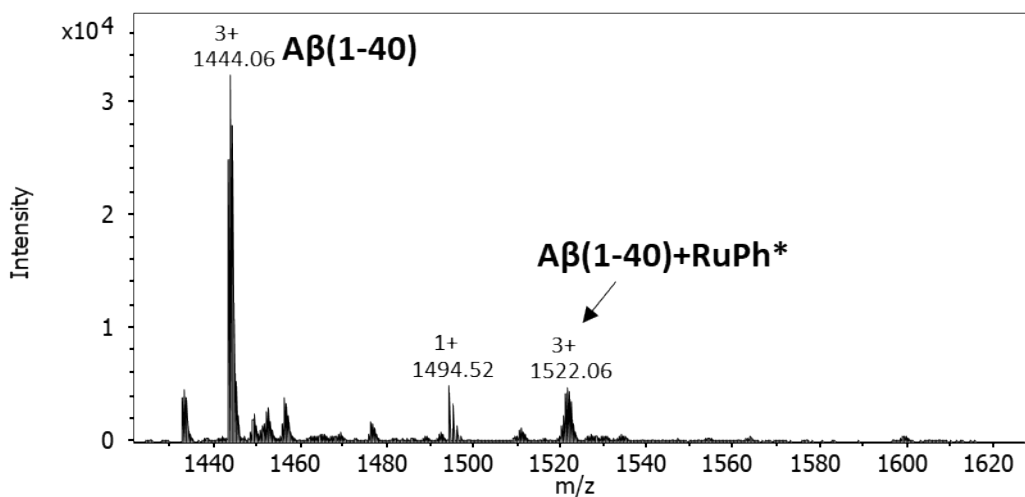

c) A $\beta$ (1-40) + compound 2, 1:1

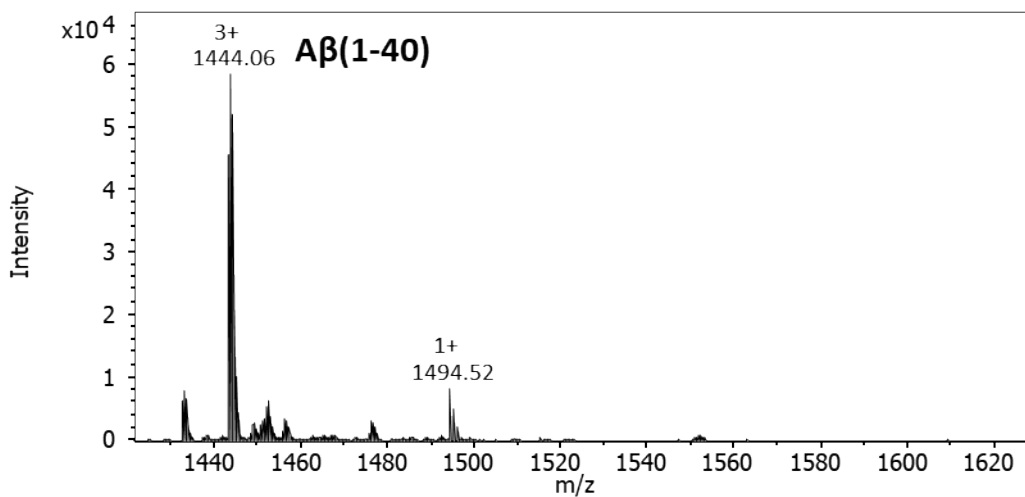

d)  $A\beta(1-40)$  + compound **3**, 1:1

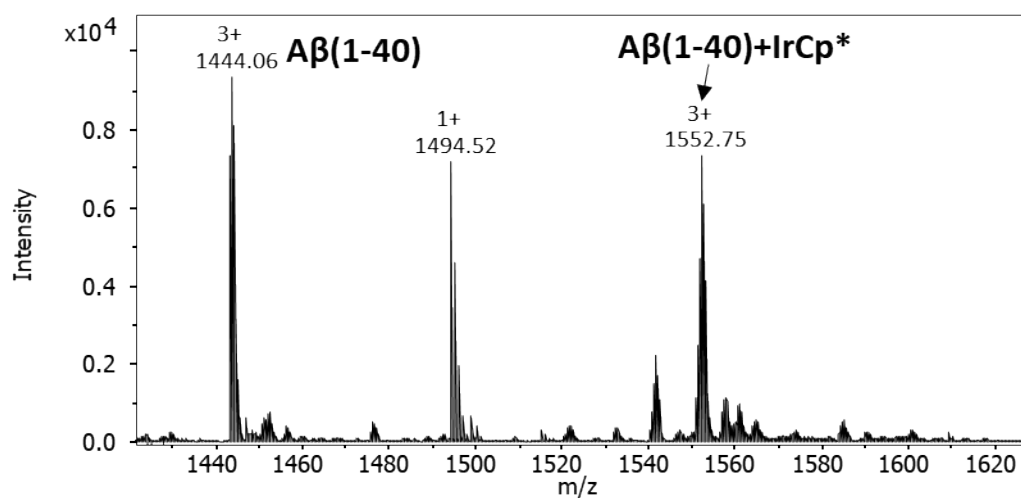

e)  $A\beta(1-40)$  + compound **4**, 1:1

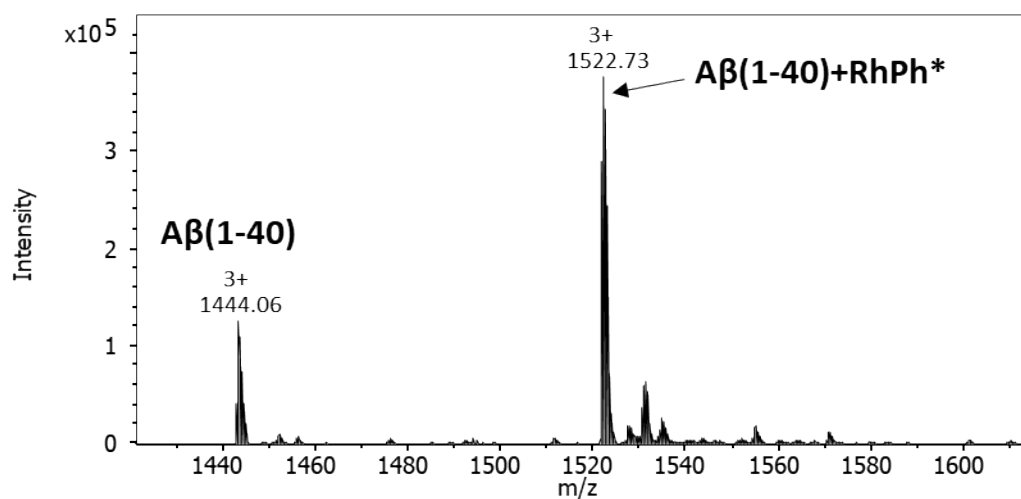

**Figure S7.** ESI-MS spectra recorded after the incubation of  $A\beta(1-40)$  peptide with equimolar amounts of compounds **1-4** at 37 °C for 24 h. [ $A\beta(1-40)$ ]= 10  $\mu$ M, PBS.

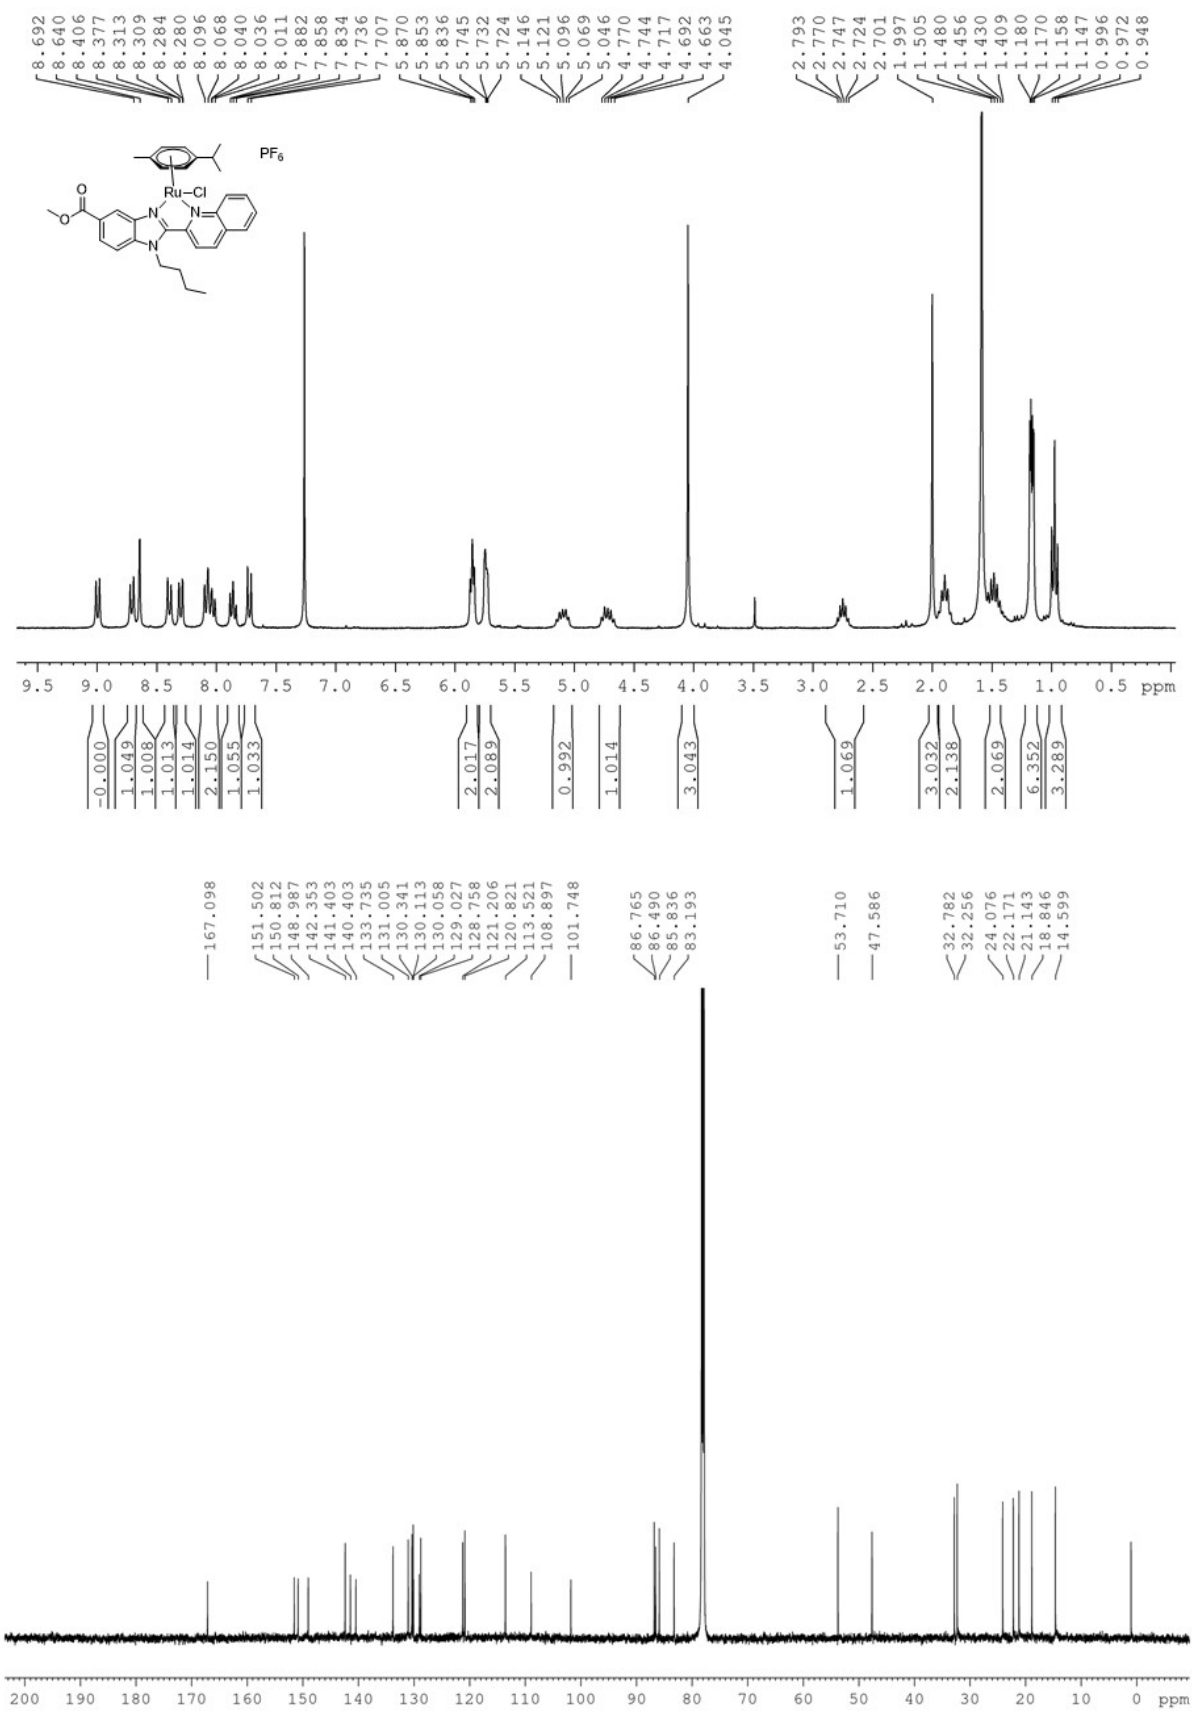

**Figure S8.** <sup>1</sup>H NMR (top) and <sup>13</sup>C NMR (bottom) spectra of complex **1** (600 MHz, CDCl<sub>3</sub>).

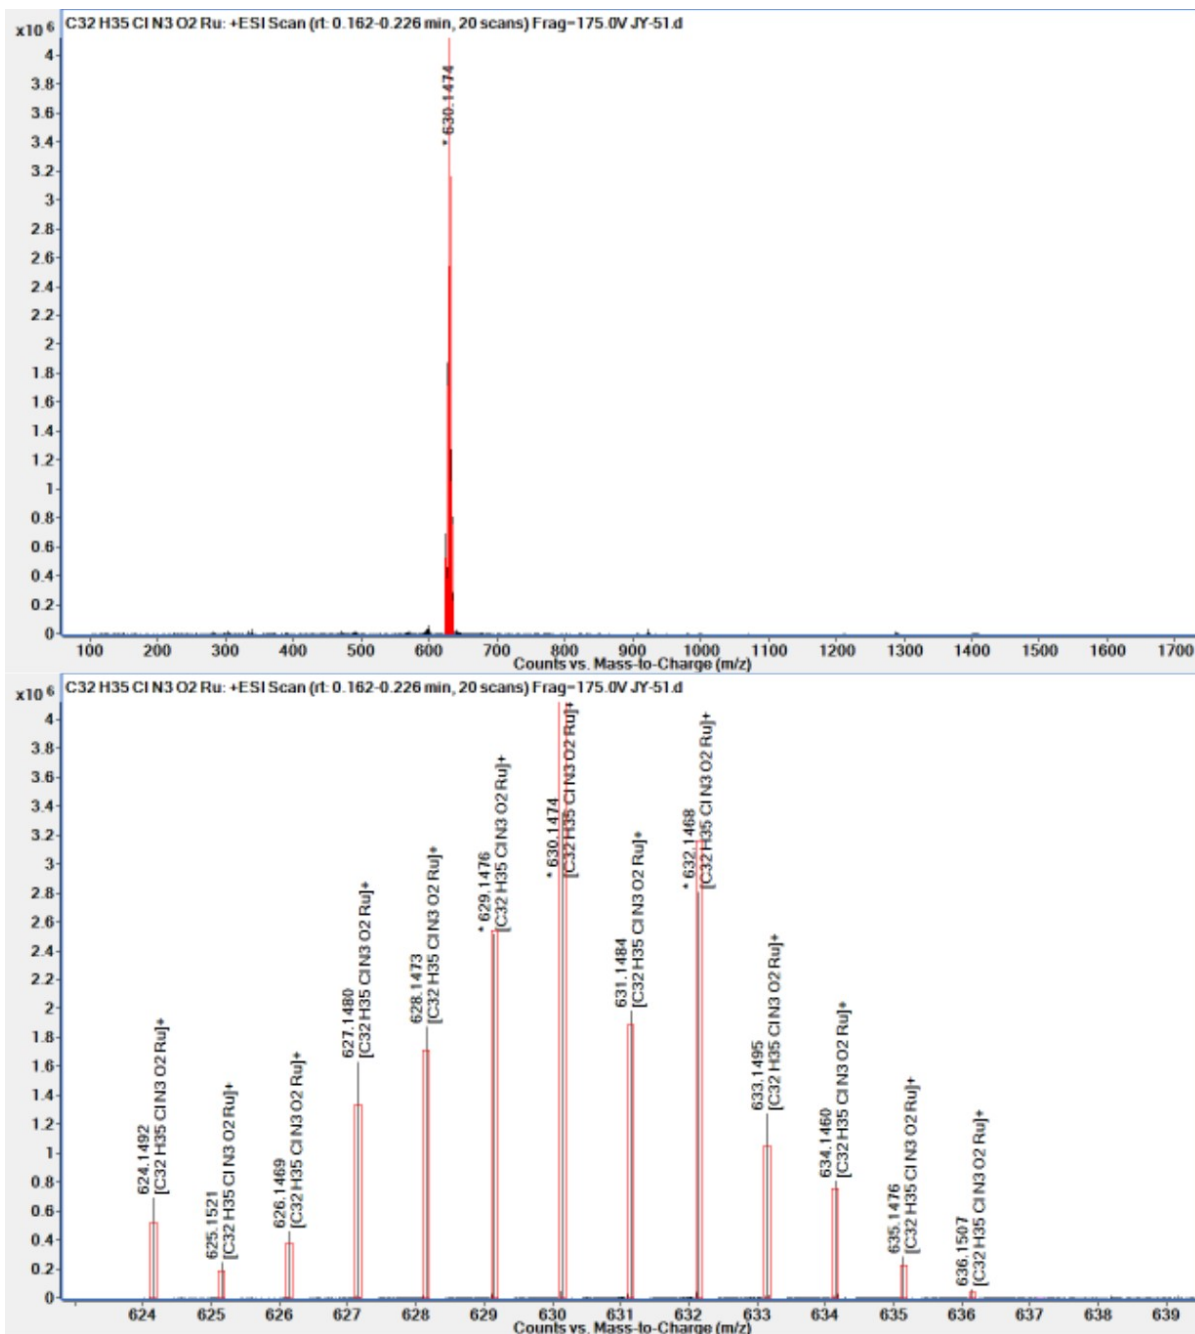

Figure S9. ESI MS spectra of 1.

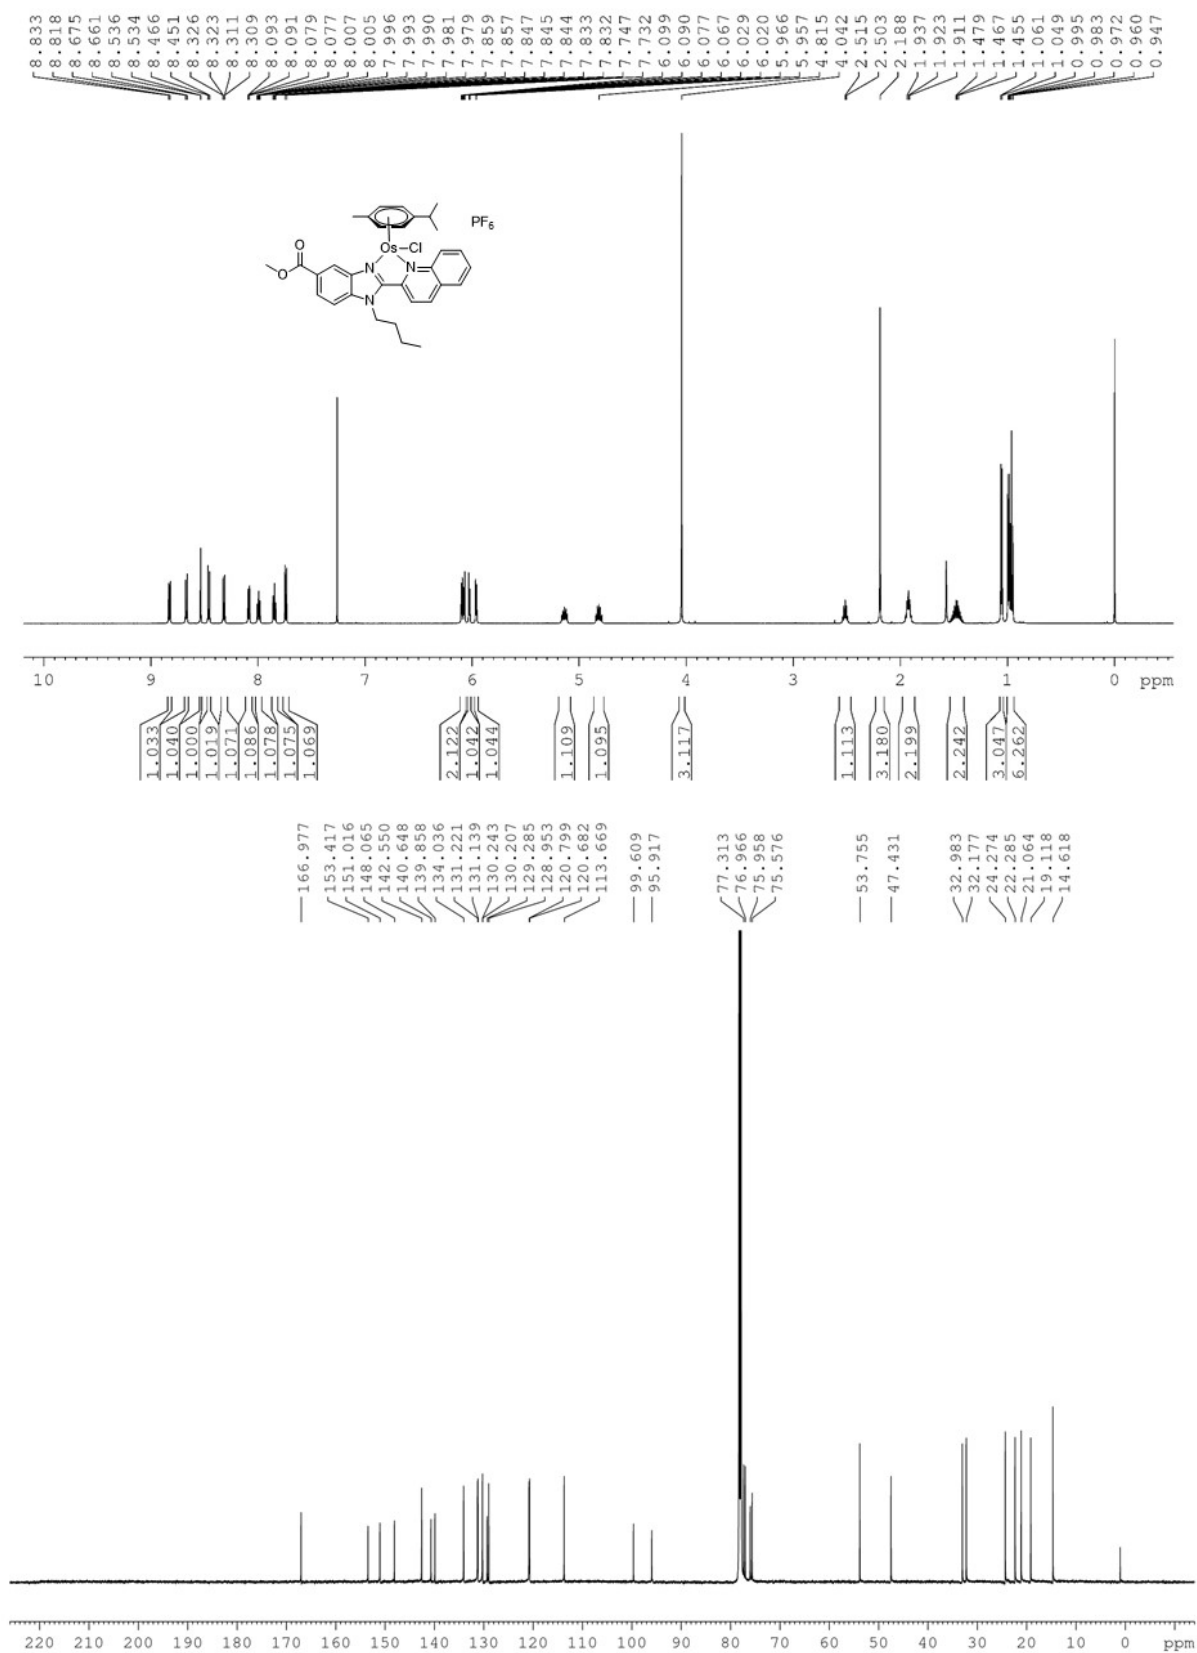

**Figure S10.** <sup>1</sup>H NMR (top) and <sup>13</sup>C NMR (bottom) spectra of complex **2** (600 MHz, CDCl<sub>3</sub>).

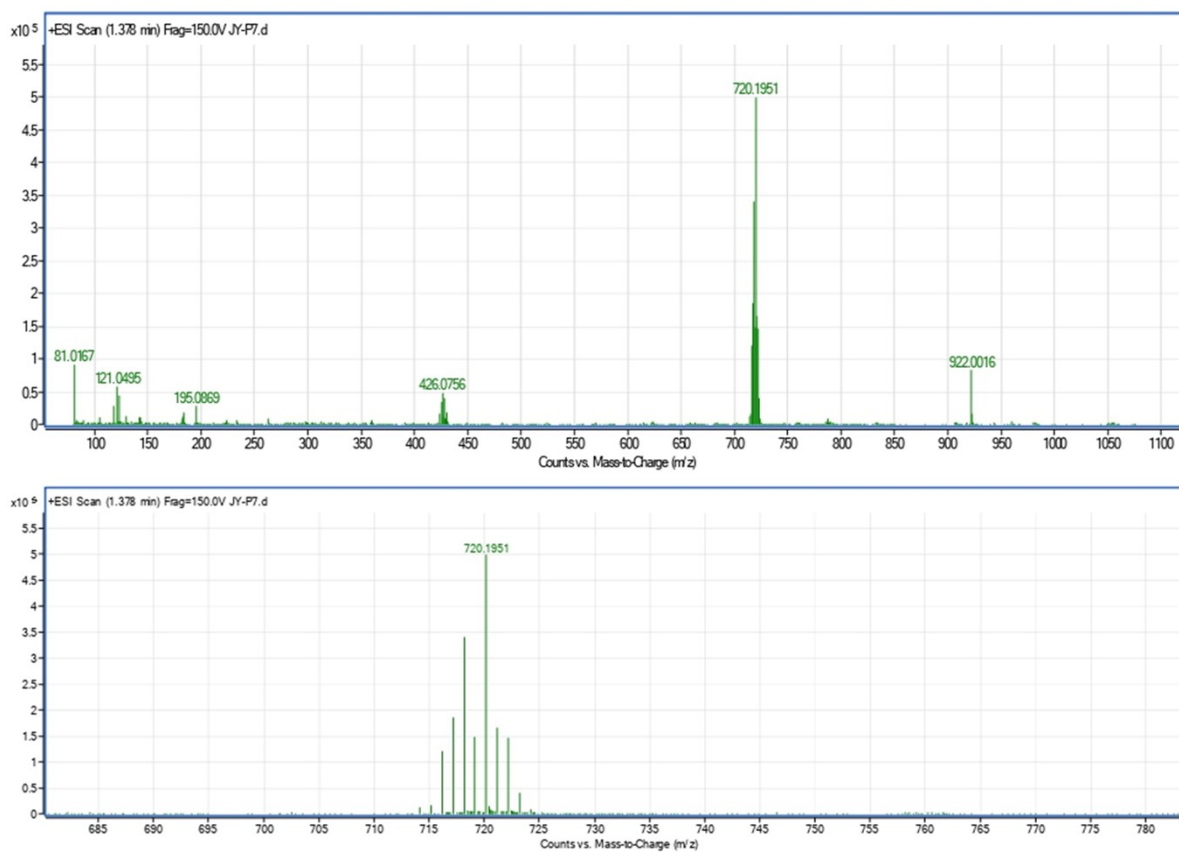

**Figure S11.** ESI MS spectra of **2**.

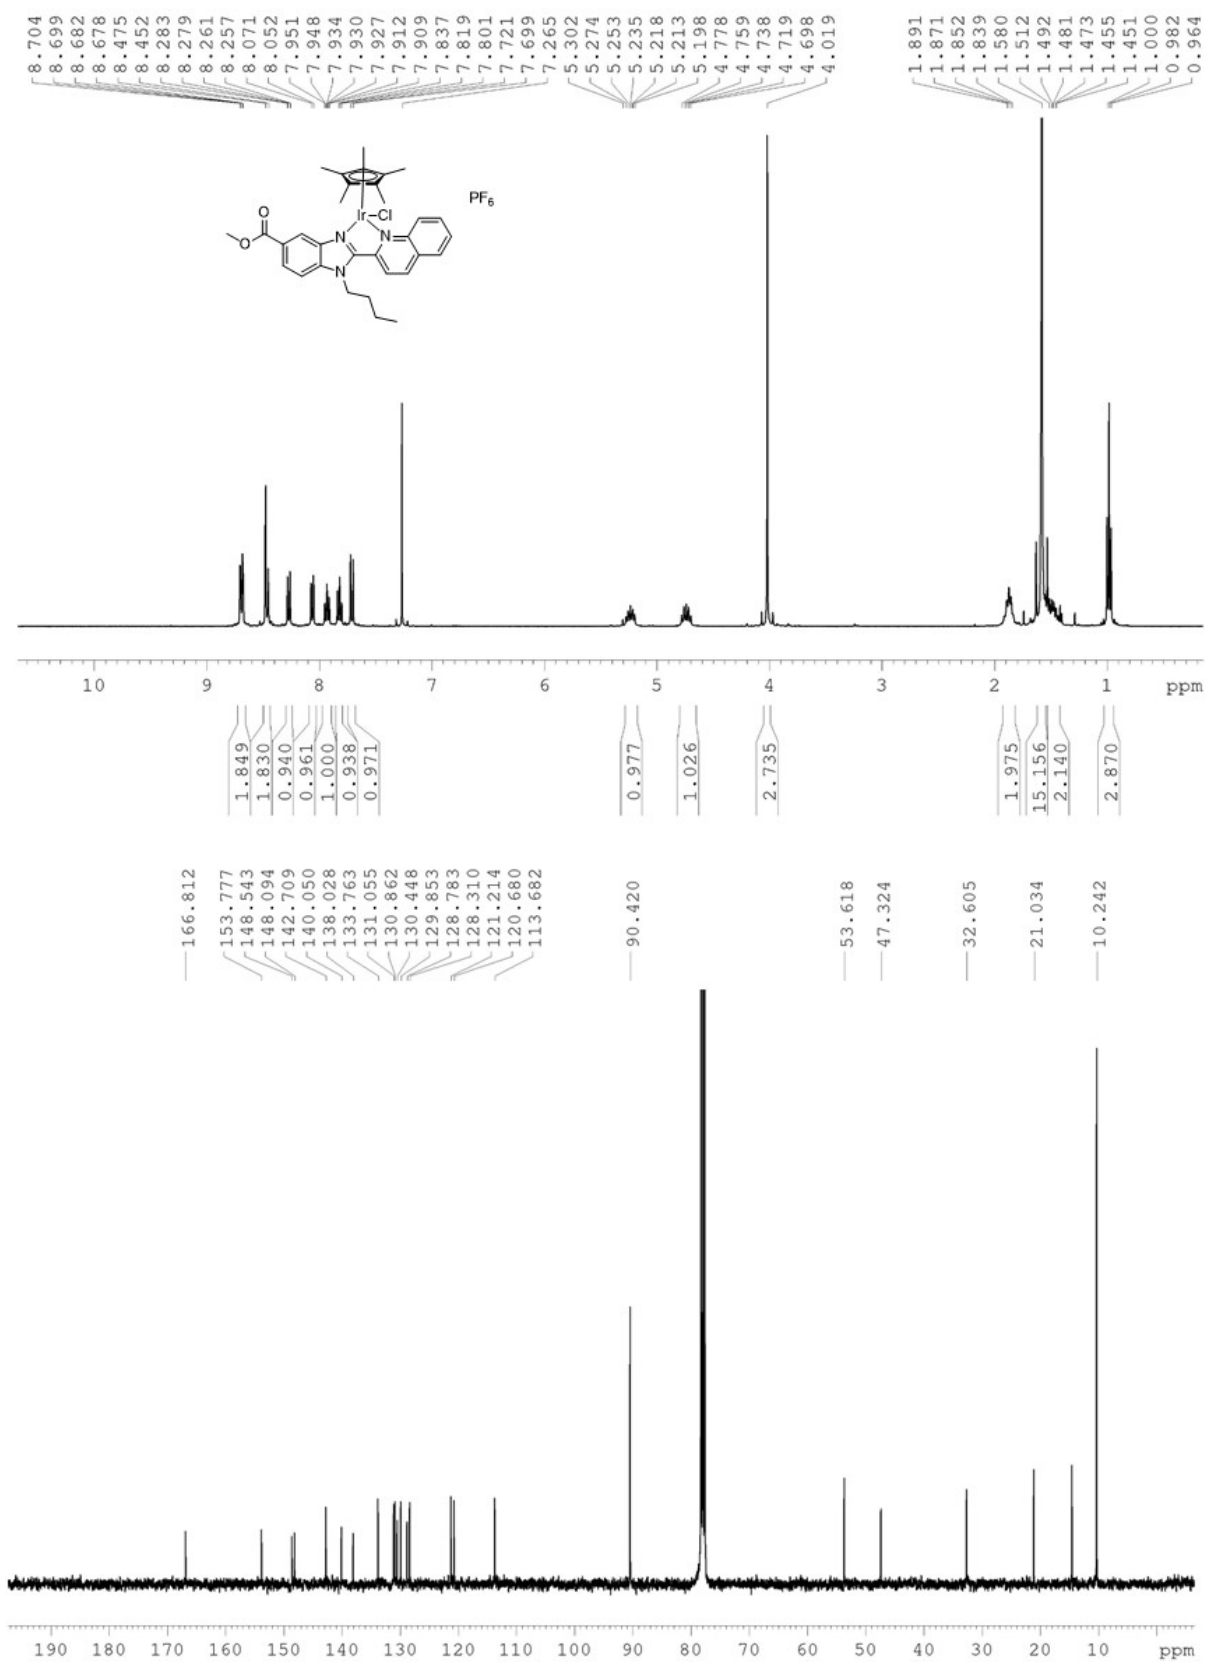

**Figure S12.** <sup>1</sup>H NMR (top) and <sup>13</sup>C NMR (bottom) spectra of complex **3** (400 MHz, CDCl<sub>3</sub>).

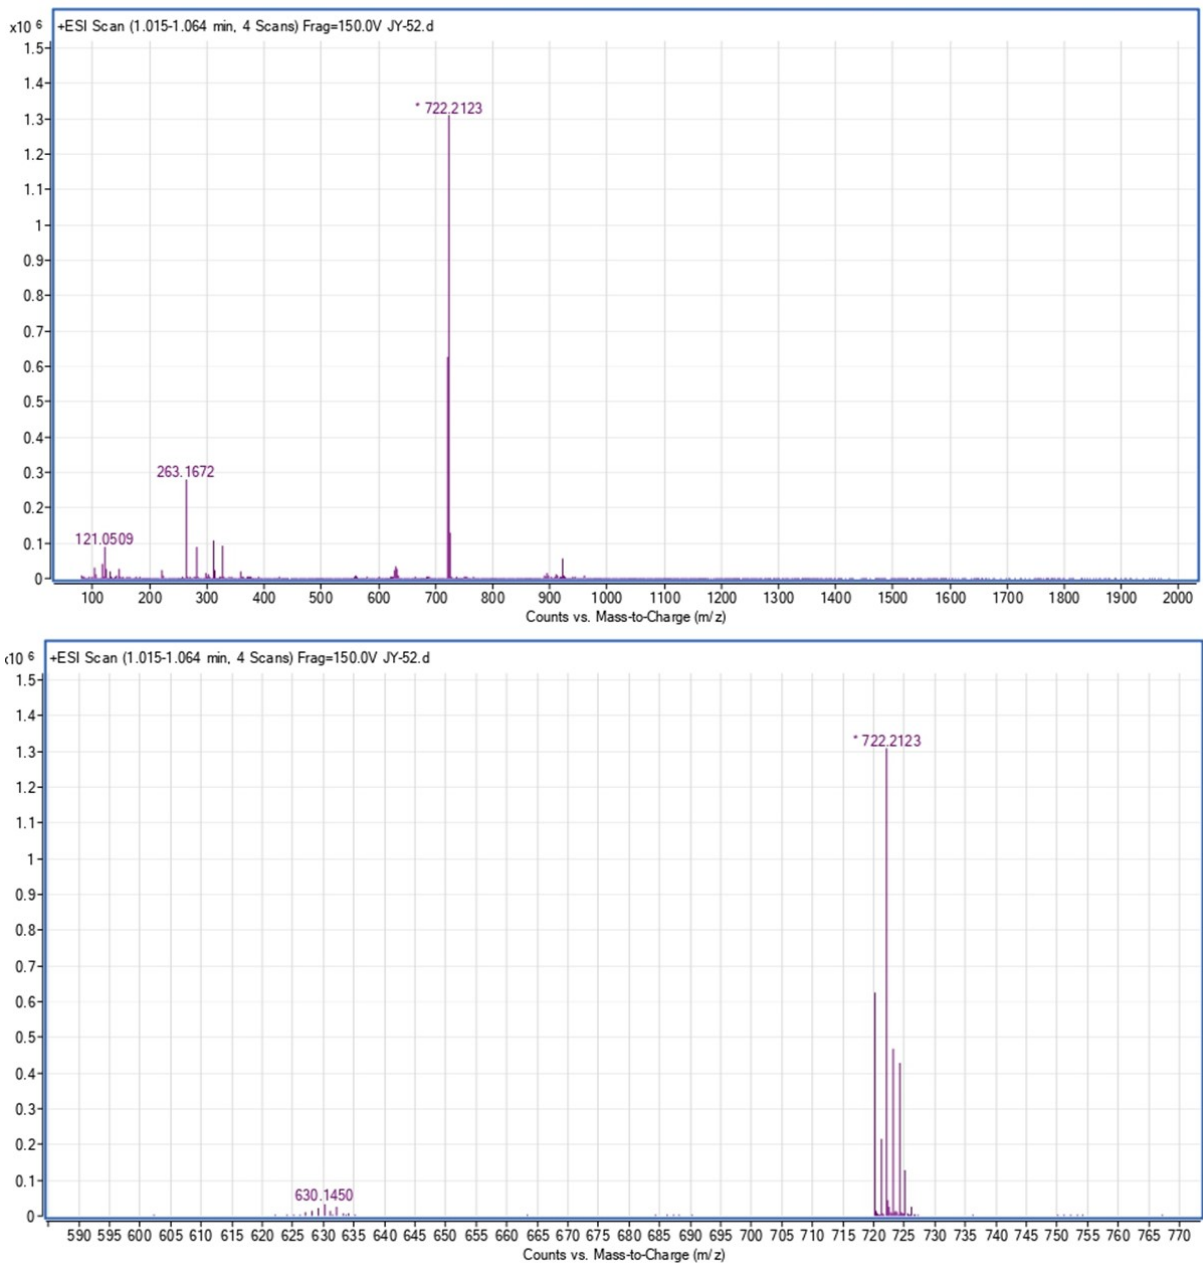

**Figure S13.** ESI MS spectra of **3**.



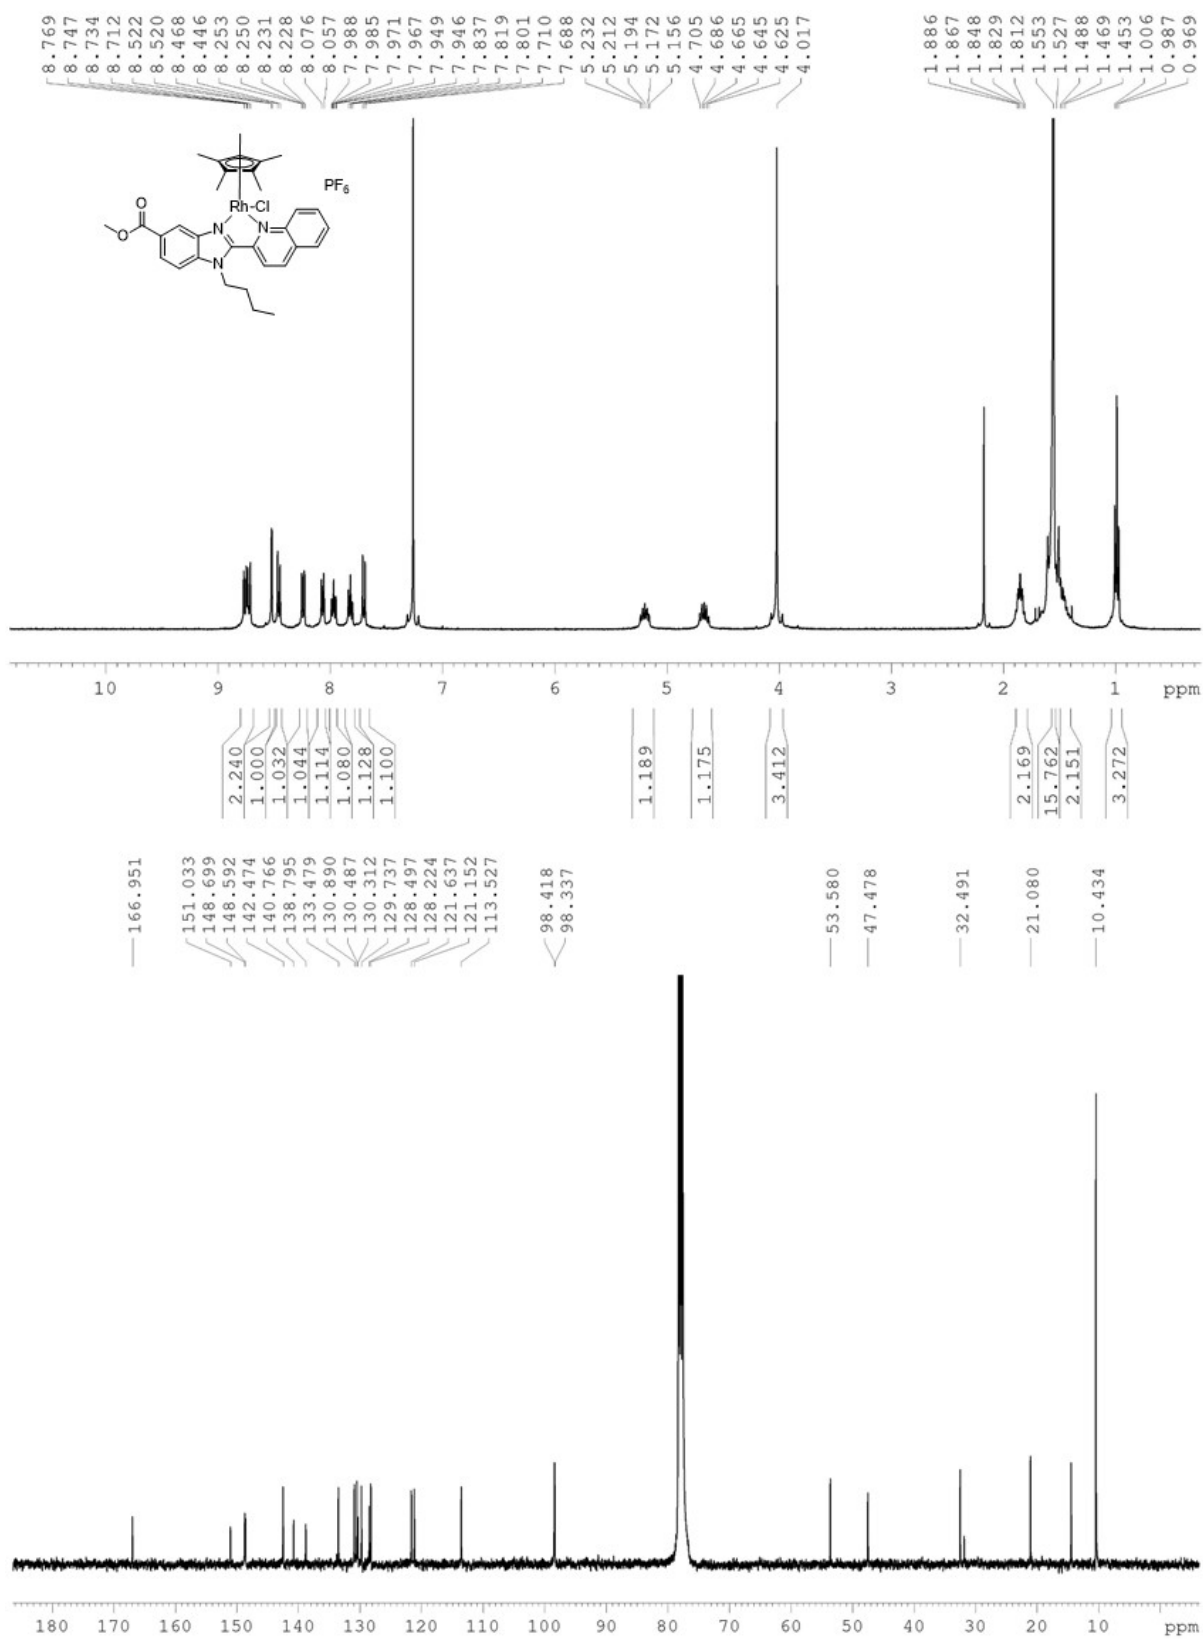

**Figure S14.** <sup>1</sup>H NMR (top) and <sup>13</sup>C NMR (bottom) spectra of complex **4** (400 MHz, CDCl<sub>3</sub>).

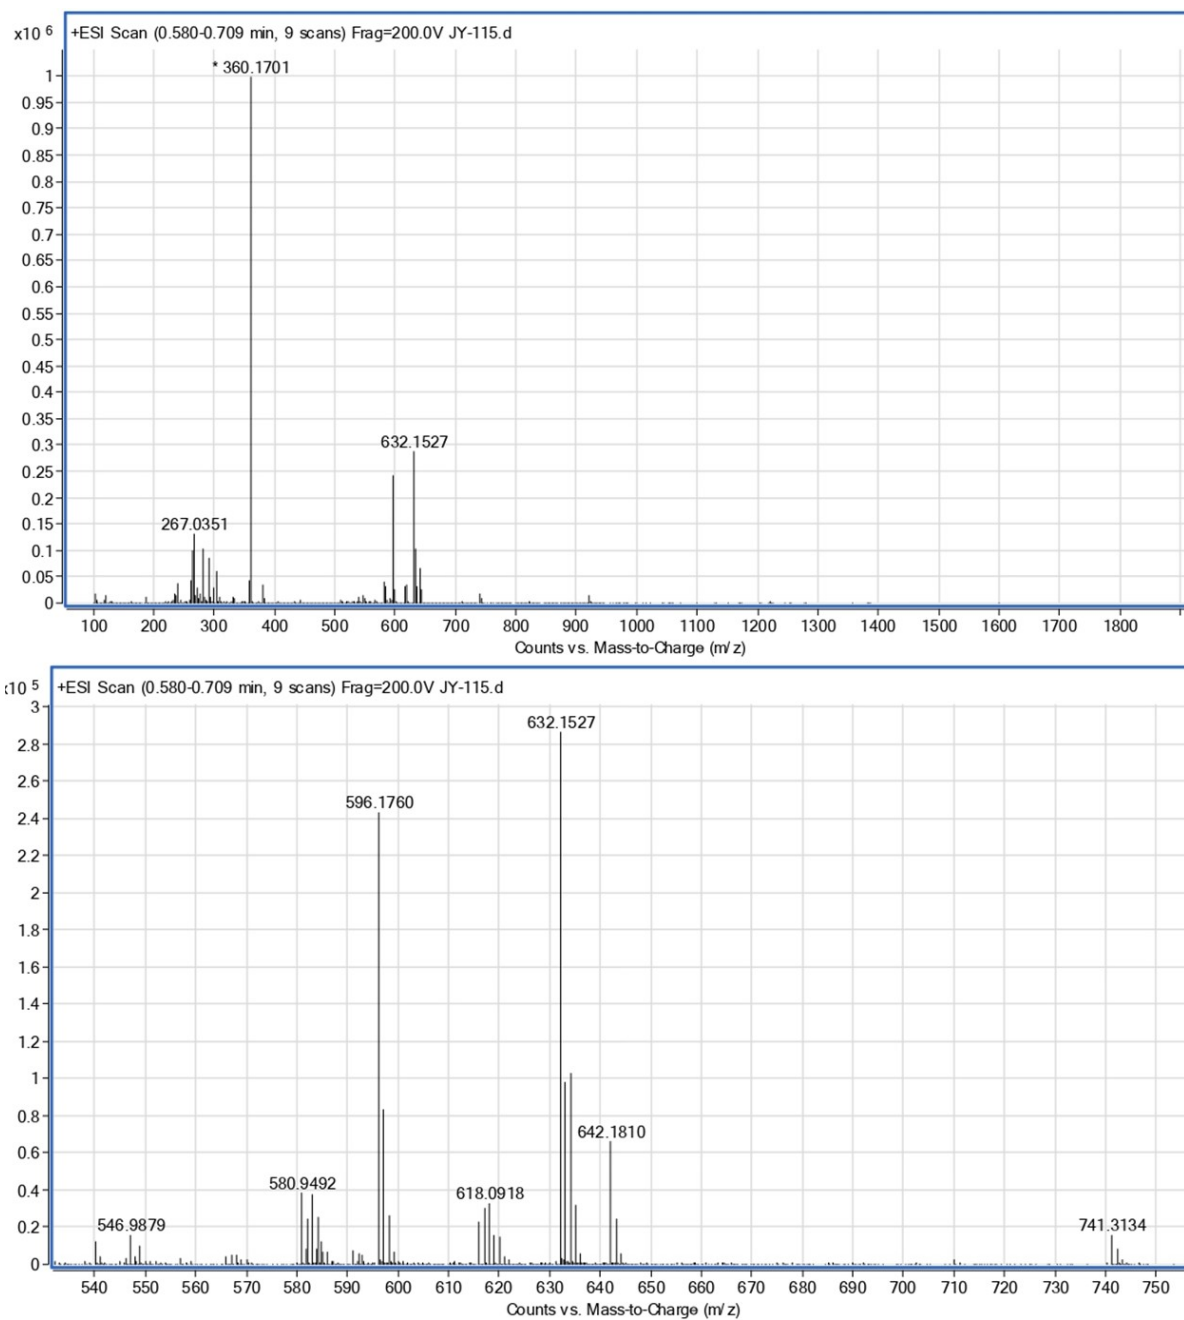

**Figure S15.** ESI MS spectra of **4**.
